# Potential implications of Apolipoprotein E in early brain injury after experimental subarachnoid hemorrhage: Involvement in the modulation of blood-brain barrier integrity

Jinwei Pang<sup>1,\*</sup>, Yue Wu<sup>2,\*</sup>, Jianhua Peng<sup>1</sup>, Ping Yang<sup>3</sup>, Li Kuai<sup>4</sup>, Xinghu Qin<sup>1</sup>, Fang Cao<sup>5</sup>, Xiaochuan Sun<sup>2</sup>, Ligang Chen<sup>1</sup>, Michael P. Vitek<sup>6</sup> and Yong Jiang<sup>1</sup>

<sup>1</sup> Department of Neurosurgery, The Affiliated Hospital of Southwest Medical University, Luzhou, China

<sup>2</sup> Department of Neurosurgery, The First Affiliated Hospital of Chongqing Medical University, Chongqing, China

<sup>3</sup> Department of Vasculocardiology, The Affiliated Hospital of Southwest Medical University, Luzhou, China

<sup>4</sup> Department of Ophthalmology, The Affiliated Hospital of Southwest Medical University, Luzhou, China

<sup>5</sup> Department of Neurovascular Disease, The Affiliated Hospital of Zunyi Medical College, Zunyi, China

<sup>6</sup> Department of Medicine (Neurology), Duke University Medical Center, Durham, North Carolina, United States

\* co-first authors

**Correspondence to:** Yong Jiang, email: jiangy0122@gmail.com

**Keywords:** subarachnoid hemorrhage, Apolipoprotein E, early brain injury, blood-brain barrier, neuroinflammation, Pathology Section

**Received:** April 23, 2016

**Accepted:** July 10, 2016

**Published:** July 24, 2016

## ABSTRACT

**Apolipoprotein E (ApoE) genetic polymorphisms have been implicated in the long term outcome of subarachnoid haemorrhage (SAH), but little is known about the effect of ApoE on the early brain injury (EBI) after SAH. This study investigated the potential role of APOE in EBI post-SAH. Multiple techniques were used to determine the early BBB disruption in EBI post-SAH in a murine model using wild-type (WT) and ApoE<sup>-/-</sup> (KO) mice. Progressive BBB disruption (Evans blue extravasation and T2 hyperintensity in magnetic resonance imaging) was observed before the peak of endogenous APOE expression elevation at 48h after SAH. Moreover, ApoE<sup>-/-</sup> mice exhibited more severe BBB disruption characteristics after SAH than WT mice, including higher levels of Evans blue and IgG extravasation, T2 hyperintensity in magnetic resonance imaging, tight junction proteins degradation and endothelial cells death. Mechanistically, we found that APOE restores the BBB integrity in the acute stage after SAH via the cyclophilin A (CypA)-NF-κB-proinflammatory cytokines-MMP-9 signalling pathway. Consequently, although early BBB disruption causes neurological dysfunctions after SAH, we capture a different aspect of the effects of APOE on EBI after SAH that previous studies had overlooked and open up the idea of BBB disruption as a target of APOE-based therapy for EBI amelioration research in the future.**

## INTRODUCTION

Despite intense clinical efforts including surgical clipping and interventional embolization, subarachnoid haemorrhage (SAH) remains a devastating condition with case fatality rates of approximately 50% and one third of survivors requiring lifelong care [1]. Although the patients' neurological outcome is mainly determined by the severity of initial bleeding [2], secondary brain injuries after bleeding also contribute to the high mortality

and disability [3, 4]. Considering no interventions for the prevention of SAH currently exist [5], pharmacotherapy has an accepted role in reducing the secondary brain injuries post-SAH.

Traditionally, cerebral vasospasm (CVS) induced delayed cerebral ischemia (DCI) was defined the primary cause of SAH induced poor outcome of patients [6]. However, the results of most pharmacologic interventions focused on the prevention and/or alleviation of CVS failed in the outcome improvement of SAH patients or

just inconclusive [5]. Early brain injury (EBI) associated with SAH presents pathological brain changes including blood-brain barrier (BBB) disruption and others that arise within the first 72h following bleeding. These changes are now being recognized as the predominant determination of mortality and disability after SAH in humans [7]. Currently, however, therapeutic options adequately address this process are still limited [8].

Apolipoprotein E (APOE: protein, *ApoE*: gene) is the major apolipoprotein that is abundantly secreted by astrocytes in the central nervous system. APOE displays a strong BBB stabilization property [9], which may be beneficial for ameliorating EBI and stimulating subsequent improvements of neurological outcomes of SAH patients. Going further, the clinical translational potential of APOE-based research post-SAH lies in the fact that a series of APOE mimetic peptide have been demonstrated to be efficient neuroprotective agents [10, 11].

Therefore, we hypothesized that APOE was involved in EBI post-SAH through modification of the integrity of the BBB integrity. To approach this idea, we now describe behavioural, histological, molecular biological and ultrastructural data showing changes in BBB following SAH and the underlying molecular mechanisms that depend upon the presence or absence of APOE.

## RESULTS

### SAH severity and animal mortality

The SAH grade was determined by scoring as previously described [12] and did not reveal any significant difference between WT and *ApoE*-deficient mice. No animal died in the WT-SHAM, WT-SHAM+saline and KO-SHAM groups. The overall mortality rate up to 72h after SAH was 28.57% (34 of 119) in the WT group and 39.02% (16 of 41) in the KO group. Although the mortality in the KO group was higher than the WT group, however, we failed to make a significant statistic

difference of mortality between these groups (Figure 1,  $p > 0.05$ ).

### Brain edema after SAH and neurobehavioral dysfunctions after SAH

Brain edema is not only a predictor of EBI, but also a good parameter for assessment of BBB integrity. In the current study,  $T_2$  signal intensity values in the outlined region of interest (Figure 2A) gradually increased with time, peaking at 48h and then beginning to decline after SAH (Figure 2B, 2C). The brain water content (BWC) matched the  $T_2$  signal intensity value change with a peak at 48h after SAH and then began to decline (Figure 2D). (\*\* $p < 0.01$ , \* $p < 0.05$  respectively,  $n = 5$ ).

The RR latency and Modified Garcia Score (MGS) decreased dramatically at 6h after SAH relative to their sham-operated counterparts. At later times, the rotorod (RR) latency and MGS performance gradually improved but continuously remained below the sham group levels. Meanwhile, compared with sham-operated mice, body weight loss progressively increased and peaked at 48h after SAH (Figure 2E-2G). (\*\* $p < 0.01$ , \* $p < 0.05$  respectively,  $n = 5$ ).

### Endogenous APOE expression after SAH

Compared to sham treated mice, the expression of APOE began to elevate at 6h after SAH induction. By 24h, APOE was significantly increased and peaked at 48h. (Figure 3A, 3C). The immunofluorescent staining of APOE also continuously increased and peaked at 48h. In addition, a significantly increased colocalization of glial fibrillary acidic protein (GFAP) positive APOE immunoreactive cells with lectin positive microvessels provided important information that APOE function may be associated with the BBB integrity after SAH. (Figure 3B, 3D). (\*\* $p < 0.01$ , \* $p < 0.05$  respectively,  $n = 5$ ).

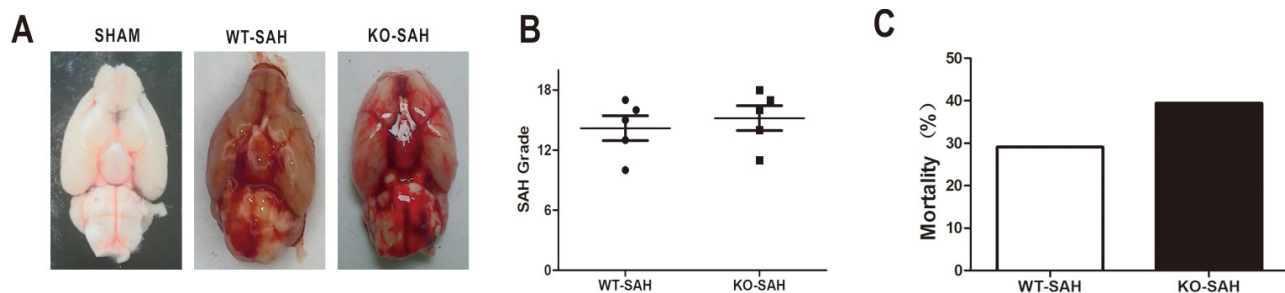

**Figure 1: SAH grade and overall mortality.** Data are expressed as mean  $\pm$  SEM. **A.-B.**, SAH grade in WT group and *ApoE* KO group were not significantly different. **C.** The overall mortality rate within 72h after SAH was 28.57% (34 of 119) in the WT group and 39.02% (16 of 41) in the KO group, with nonstatistical difference.

## *ApoE* deficiency affects neurological dysfunctions after SAH

To further identify the involvement of APOE in EBI following SAH, we elucidated the neurological defects in *ApoE*<sup>-/-</sup> mice at 48h after SAH. Endogenous APOE expression was absent in the KO group mice (Figure 4A-4D). There was no significant difference in body weight loss (BWL), RR latency, MGS or brain edema between the sham groups (WT-SHAM vs KO-SHAM, @ means  $p > 0.05$ ,  $n = 5$ ). During the experimental lesion, *ApoE*-deficient mice displayed more BWL, shorter RR latency and less MGS compared with WT mice (Figure 4E-4G). (WT-48H vs KO-48H, \*\* $p < 0.01$ , \* $p < 0.05$  respectively,

$n = 5$ ). These data strongly support the hypothesis that APOE contributes to the process of EBI following a SAH insult to the brain.

## *ApoE* deficiency affects BBB integrity after SAH

A previous report showed that APOE controls the BBB integrity under physiological conditions [9]. To determine whether APOE controls the BBB integrity after SAH, we measured brain edema and BBB disruption in *ApoE*<sup>-/-</sup> mice at 48h after SAH. There was no significant difference of brain edema before SAH (WT-SHAM vs KO-SHAM). However, the T<sub>2</sub>-hyperintensity and BWC was dramatically higher in the *ApoE*-deficient mice after

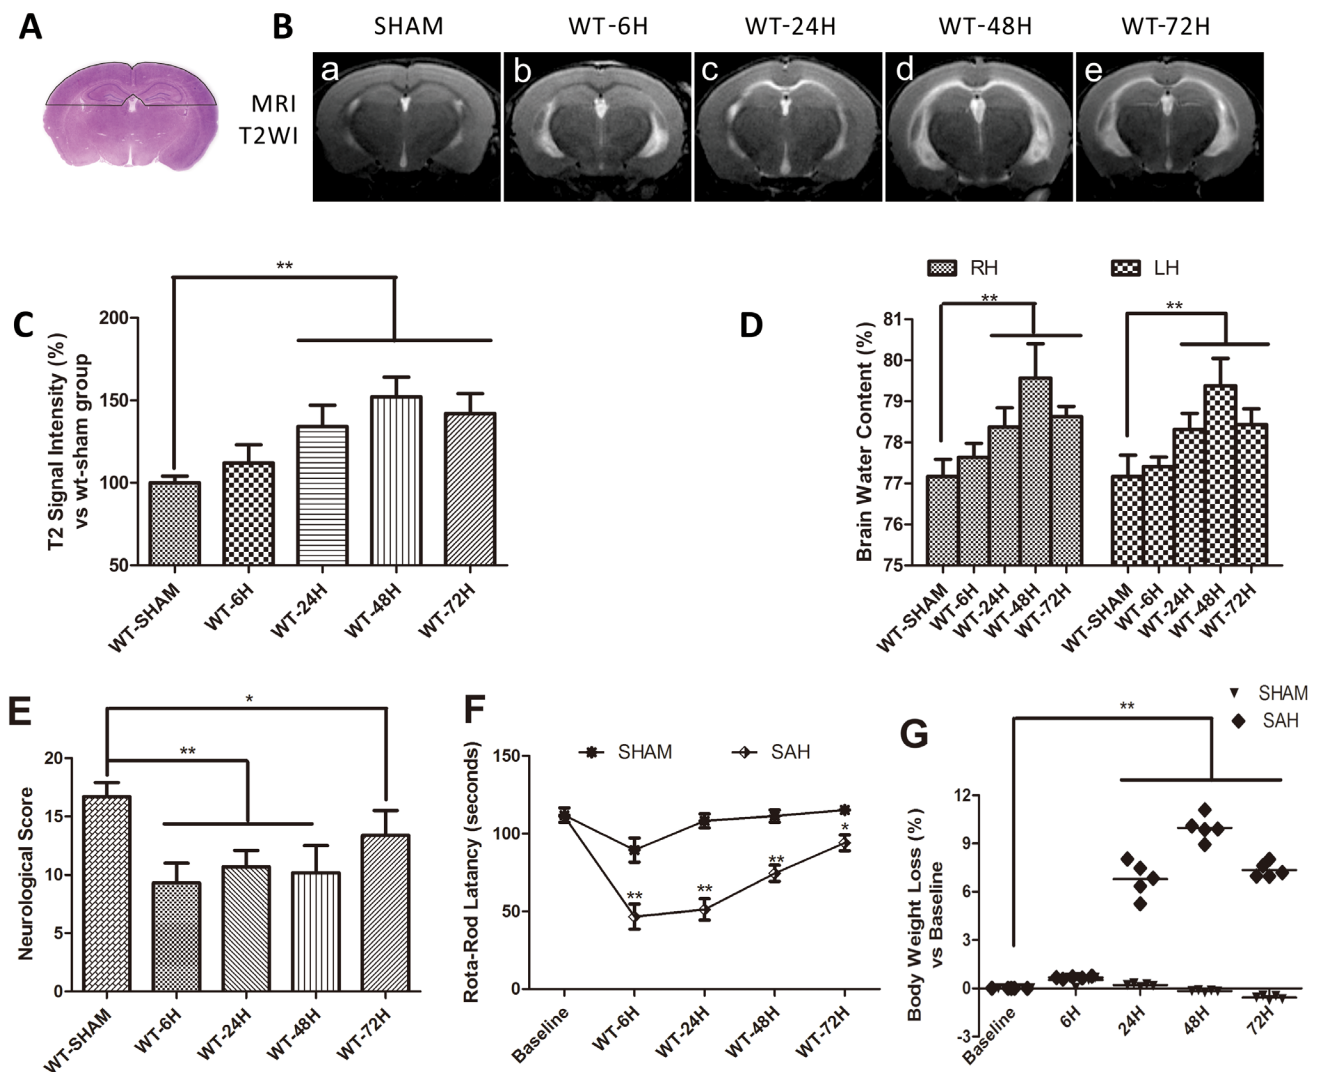

**Figure 2: Vasogenic cerebral edema and neurobehavioral defects after SAH.** Data are expressed as mean  $\pm$  SEM. **A.** The dotted area in represented the region of interest (ROI) contain the bilateral parietal lobe sensorimotor cortex and hippocampus sensitive to damage. The vasogenic cerebral edema was significantly increased at 24h and peaked at 48h (\*\* $P < 0.01$ ,  $n = 5$ ). **B.-C.** Brain water content (BWC) resulted in the similar change (\*\* $P < 0.01$ ,  $n = 5$ ). **D.** RH = right hemisphere, LH = left hemisphere). **E.-G.** The RR latency and Modified Garcia Score (MGS) decreased dramatically at 6h after SAH relative to their sham-operated counterparts. At later times, the rotorod (RR) latency and MGS performance gradually improved but continuously remained below the sham group levels. Meanwhile, compared with sham-operated mice, body weight loss progressively increased and peaked at 48h after SAH. (\*\* $P < 0.01$ , \* $P < 0.05$  respectively,  $n = 5$ ).

SAH (Figure 5A-5C, WT-48H vs KO-48H, @ means  $p > 0.05$ ,  $**p < 0.01$  and  $*p < 0.05$  respectively,  $n = 5$ ).

Evans blue (EB) has a high affinity with plasma albumin. After SAH, BBB integrity was damaged as evidenced by observation of albumin leakage and localization around the blood vessels [13]. In the current study, we found that EB extravasation was significantly increased at 48h after SAH while *ApoE*-deficient subjects exhibited a greater brain EB content as shown in Figure 5D (WT-48H vs KO-48H,  $**p < 0.01$ ,  $*p < 0.05$  respectively,  $n = 5$ ).

Different from the EB extravasation, the IgG molecular weight is far larger than albumin and IgG extravasation represent a further disruption of the BBB [14]. IgG immunofluorescence staining was also significantly increased at 48h after SAH with greater levels in *ApoE*-deficient mice which suggest a more severe BBB disruption (Figure 5E-5F,  $**p < 0.01$ ,  $*p < 0.05$  respectively,  $n = 5$ ).

### ApoE deficiency affects BBB structure after SAH

To make sure that APOE affects the BBB structure after SAH, we examined the expression of the major tight junction proteins (TJs), BBB transmission electron microscopy (TEM) scanning, and endothelial cells apoptosis status in the brain microvessels.

The three main TJs were not significantly different between the sham groups (WT-SHAM vs KO-SHAM, @ represents  $p > 0.05$ ,  $n = 5$ ). However, TJs were dramatically reduced 48 h after SAH and further affected by *ApoE* deficiency (WT-48H vs KO-48H,  $**p < 0.01$ ,  $*p < 0.05$ ,  $n = 5$ ). Similarly, TEM observation showed more disruptions in TJs and vacuolations between endothelial cells (Figure 6).

Endothelial cells, another main component of the BBB, was also further injured in *ApoE*-deficient mice at 48 h after SAH. Apoptosis-related proteins including BAX and Cleaved Caspase-3 were significantly upregulated, while the anti-apoptotic protein BCL2 was decreased after

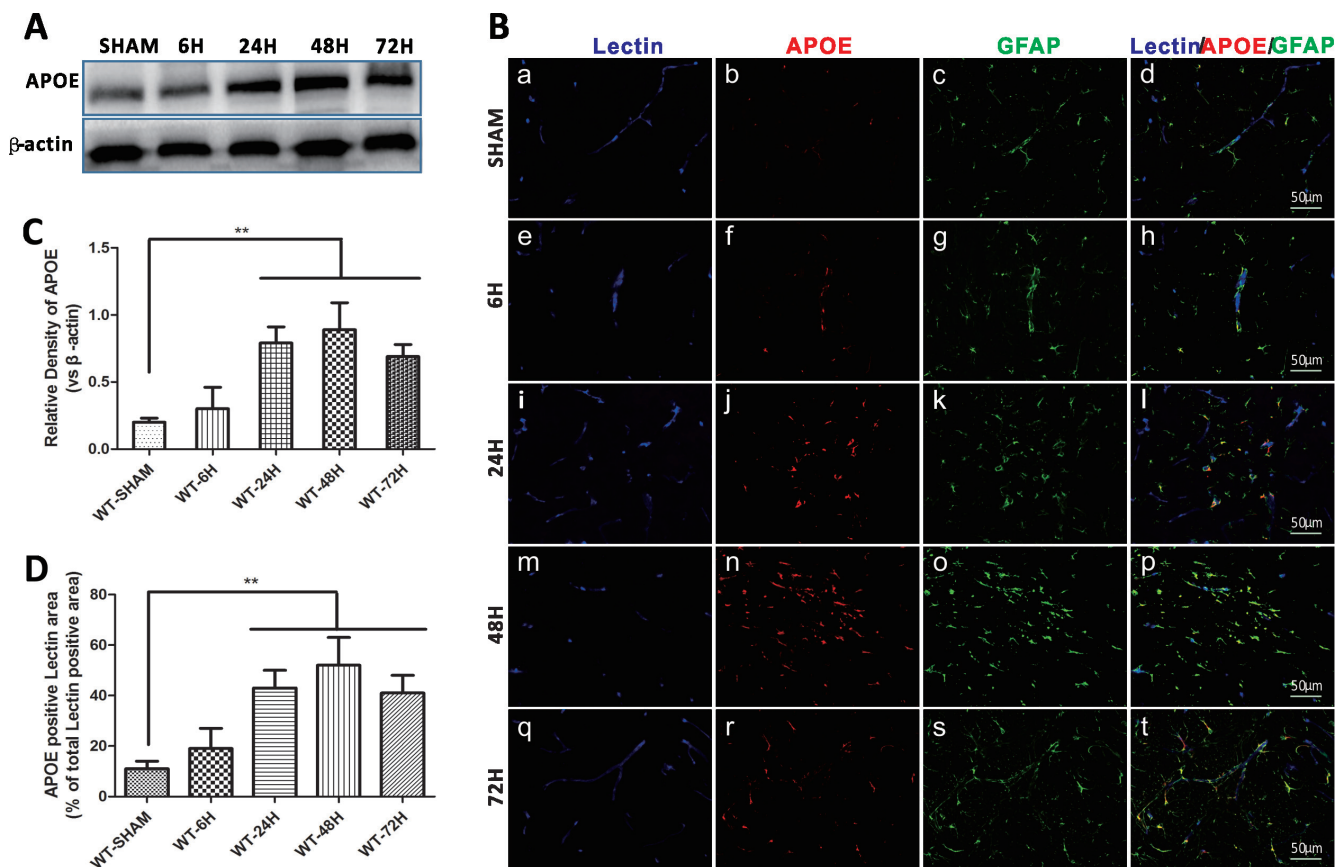

**Figure 3: Endogenous APOE expression after SAH.** Data are expressed as mean  $\pm$  SEM. In sham group, the endogenous APOE expression level was relative low in the astrocytes. After subarachnoid hemorrhage (SAH), APOE in the astrocytes were gradually elevated, up to 24h, the APOE expression was significantly up-regulated and peaked at 48h ( $**P < 0.01$ ) A.-C.. The perivascular space APOE positive cells were significantly increased at 24h and 48h, provided an information indicating that APOE function in early brain injury (EBI) is associated with the BBB integrity modulation after SAH ( $**P < 0.01$ ) C., D.. (Scale bars = 50 $\mu$ m, Blue lectin positive area indicate microvessels; green GFAP positive area indicate astrocytes; red APOE positive area indicate APOE;  $n = 5$  each group).

SAH. This phenomenon was more pronounced in *ApoE*-deficient mice, which resulted in increased apoptosis of endothelial cells as shown in Figure 7 (@ represents  $p > 0.05$ ,  $**p < 0.01$ ,  $*p < 0.05$ ,  $n = 5$ ).

### *ApoE* deficiency causes enhanced MMP-9 upregulation after SAH

MMP-9 is well studied for the role that it plays in the degradation of BBB TJs and endothelial cells apoptosis [15, 16]. Prior to SAH, both the expression and activity of MMP-9 was not obviously different between the two sham groups (WT-SHAM vs KO-SHAM, @ represents  $p > 0.05$ ,  $n = 5$ ). However, after SAH, both the expression and activity of MMP-9 was upregulated, with more severe changes in *ApoE*<sup>-/-</sup> mice (WT-48H vs KO-48H,  $**p < 0.01$ ,  $*p < 0.05$ ,  $n = 5$ ) (Figure 8A-8D). Moreover, the perivascular MMP-9 elevation was also significantly higher in the *ApoE*-deficient mice (Figure 8E).

### *ApoE*-deficient mice displayed enhanced inflammatory cytokines production after SAH

The inflammatory response is considered one of the main causes of MMP-9 upregulation after SAH [17, 18]. In the current study, CypA, p-p65 were slightly higher in the *ApoE*-deficient mice whereas IL-1 $\beta$ , IL-6 and TNF- $\alpha$  levels were not significantly different in the two

control groups before SAH (WT-SHAM vs KO-SHAM,  $*p < 0.05$ , @ represent  $p > 0.05$ ,  $n = 5$ ). However, both CypA, p-p65, IL-1 $\beta$ , IL-6 and TNF- $\alpha$  were dramatically up-regulated 48h after SAH with larger increases of these proteins in *ApoE*-deficient mice (WT-48H vs KO-48H,  $**p < 0.01$ ,  $*p < 0.05$  respectively,  $n = 5$ ). (Figure 9)

## DISCUSSION

In this study, we defined a therapeutic target for EBI inhibition to restrict neurological dysfunctions in experimental SAH. This approach is based on our results showing that: (1) endogenous APOE is significantly elevated at early times after SAH, (2) APOE elevation is associated with EBI inhibition through a mechanism that includes BBB-dependent changes.

Recently, emerging data support the multiple neuroprotective properties of APOE with combined anti-inflammatory [19], anti-apoptosis [20] and anti-oxidant [21] effects, all of which may be beneficial for EBI inhibition. However, evidence also exists that support a lack of effect of APOE on neuronal cells following injury [22]. At present, no direct research focused on the involvement of APOE in the pathogenesis of EBI post-SAH has been reported. Additionally, APOE expression levels change after brain injury, although different reports suggest APOE levels can be increased [23] or decreased [24]. Nevertheless, APOE changes after SAH has thus far not been described nor whether this change, if it occurs, is

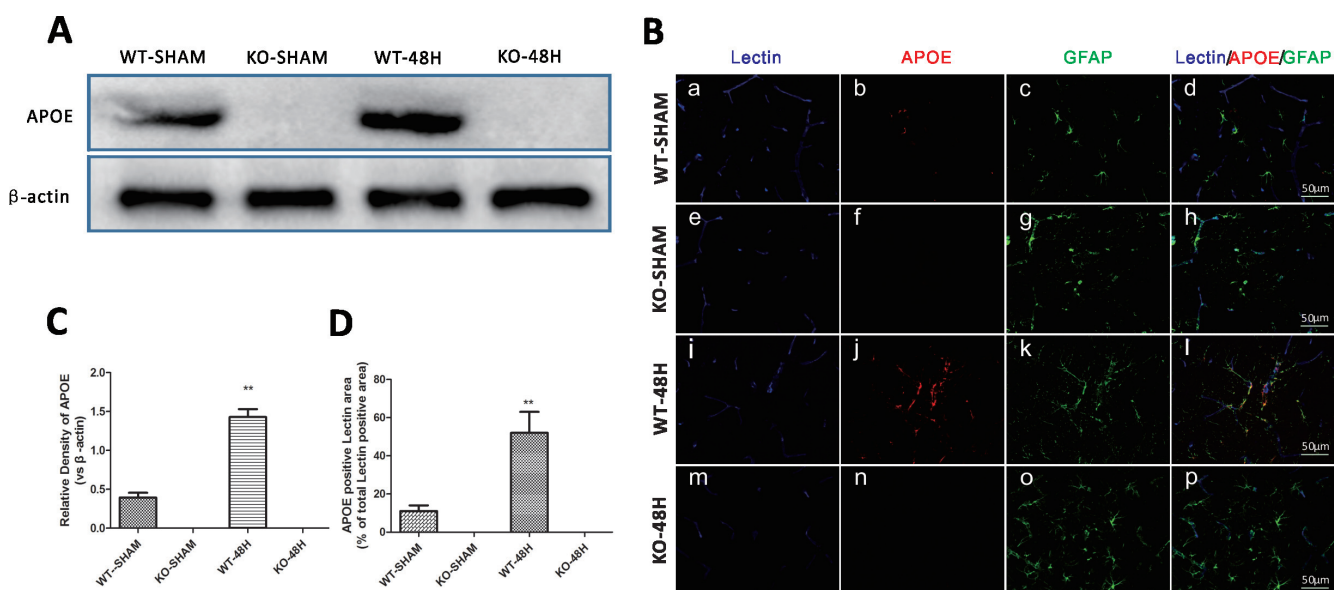

**Figure 4: *ApoE* deletion affects mice neurological defects after SAH.** Data are expressed as mean  $\pm$  SEM. The APOE protein expression was totally depleted in *ApoE*-deficient mice as shown by both western blot analysis **A**, **C**. and immunofluorescence staining **B**, **D**, while the WT mice showed a significant APOE upregulation 48h after SAH ( $**P < 0.01$ ). (Scale bars = 50 $\mu$ m, Blue lectin positive area indicate microvessels; green GFAP positive area indicate astrocytes; red APOE positive area indicate APOE;  $n = 5$  each group). There was no significant difference in body weight loss (BWL), RR latency, MGS or brain edema between the sham groups (WT-SHAM vs KO-SHAM, @ means  $p > 0.05$ ,  $n = 5$ ). During the experimental lesion, *ApoE*-deficient mice displayed more BWL, shorter RR latency and less MGS compared with WT mice **E**-**G**.. (WT-48H vs KO-48H,  $**p < 0.01$ ,  $*p < 0.05$  respectively,  $n = 5$ ).

beneficial, pernicious or neutral has been addressed.

Strikingly, we identified that the expression of APOE began to rise as early as 6h after SAH induction. By 24h post-injury, APOE was significantly increased and then peaked at 48h, followed by a gradual decline toward the baseline at 72h post-injury in the cortex. In our observation, this endogenous APOE protein level change was tightly associated with the mice neurological dysfunctions after SAH. The mice neurobehavioral functions were significantly destroyed than the sham-operated mice before the peak of APOE expression. Once the APOE reached a high level, these neurobehavioral dysfunctions recovered quickly toward the baseline. Moreover, there was no significant difference in both body weight loss (BWL), RR latency, MGS and brain edema between the sham-operated groups. However, during the experimental lesion, *ApoE*-deficient mice displayed more BWL, shorter RR latency and less MGS compared with WT mice after SAH. As a whole, these data strongly indicate that APOE is of significant benefit during the period of EBI following SAH in helping to restore normal neurological functions.

BBB disruption is an early feature of EBI. It was described as a hallmark that significant contribute to the poor outcomes of SAH patients [25]. Links between APOE and BBB integrity have been previously reported. For instance, Bell et al. [9] demonstrated that APOE controls the cerebrovascular integrity via cyclophilin A (CypA) in the aging transgenic mouse brains under physiological conditions. Zhang et al. [26] also confirmed that *ApoE*-deficiency promotes BBB disruption in experimental autoimmune encephalomyelitis *via* alteration of MMP-9. However, the BBB disruption observed in the above reports are more of a chronic inflammatory response, whereas SAH induced BBB disruption is an acute response and controlled by complex mechanisms (e.g. intracranial hypertension, global brain ischemic, neuroinflammation).

From this perspective, we started to question whether the action of APOE on EBI is through modulation of BBB integrity after SAH. To explore this possibility, we used multiple techniques to reveal the functional and structural changes of BBB integrity after SAH. We found progressive increase of both brain EB content, immunoglobulin G extravasation and T2 hyperintensity

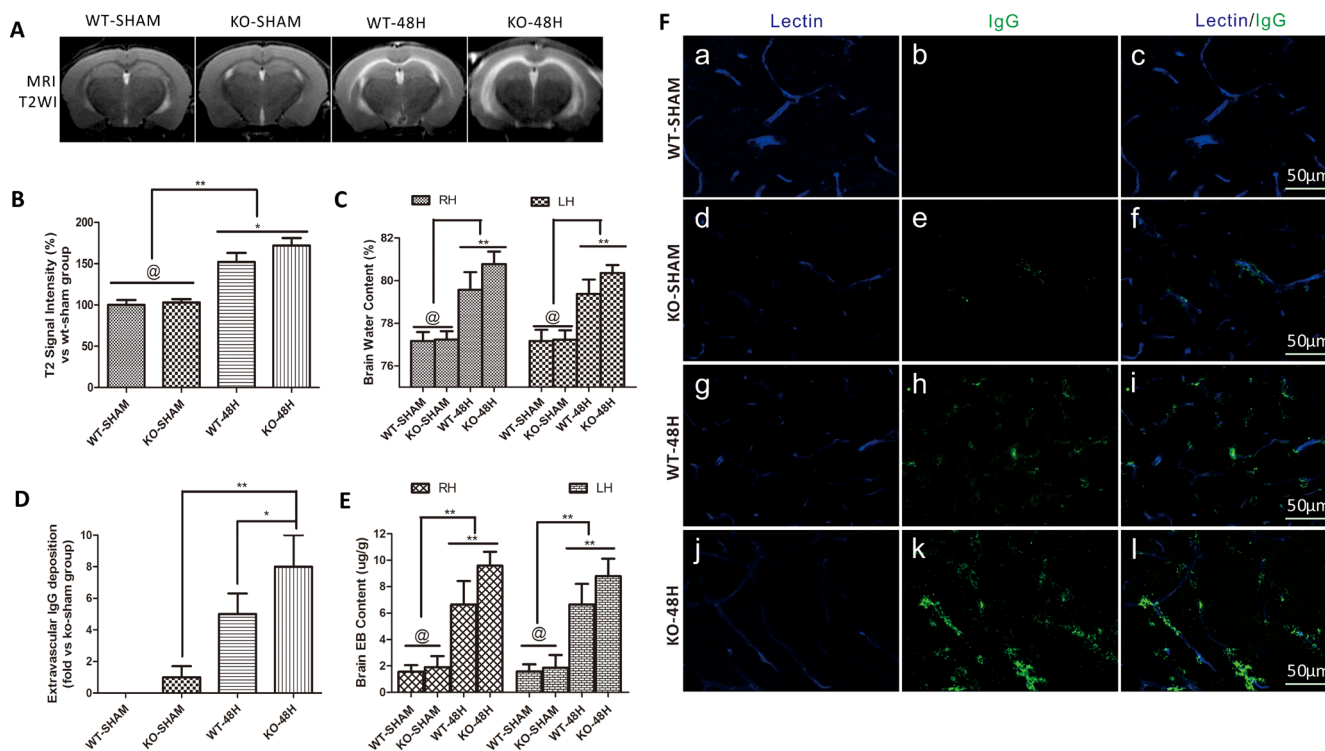

**Figure 5: *ApoE* deficiency aggravates vasogenic brain edema and BBB permeability.** Data are expressed as mean  $\pm$  SEM. A.-C. The Vasogenic cerebral edema and brain water content were not significantly deferent from each other in the sham groups (WT-SHAM vs KO-SHAM, @ represents that  $p > 0.05$ ,  $n = 5$ ). However, after SAH, T<sub>2</sub>-weight image (T2WI) MRI detected vasogenic cerebral edema in the prior dotted area and brain water content were dramatically deferent from each other with a higher edema level in the *ApoE*-deficient mice. The BBB permeability was not significantly different in the sham group detected by Evans blue (EB) extravasation D. and plasma immunoglobulin G immunofluorence staining E.-F. However, both the brain EB content and extravascular IgG deposition were significantly elevated with higher levels far from the wild-type mice in *ApoE*-deficient mice ( $*P < 0.05$ ,  $**P < 0.01$ ,  $n = 5$  respectively, RH = right hemisphere, LH = left hemisphere, Blue lectin positive area indicate microvessels; green area indicate perivascular deposition of IgG;  $n = 5$  each group).

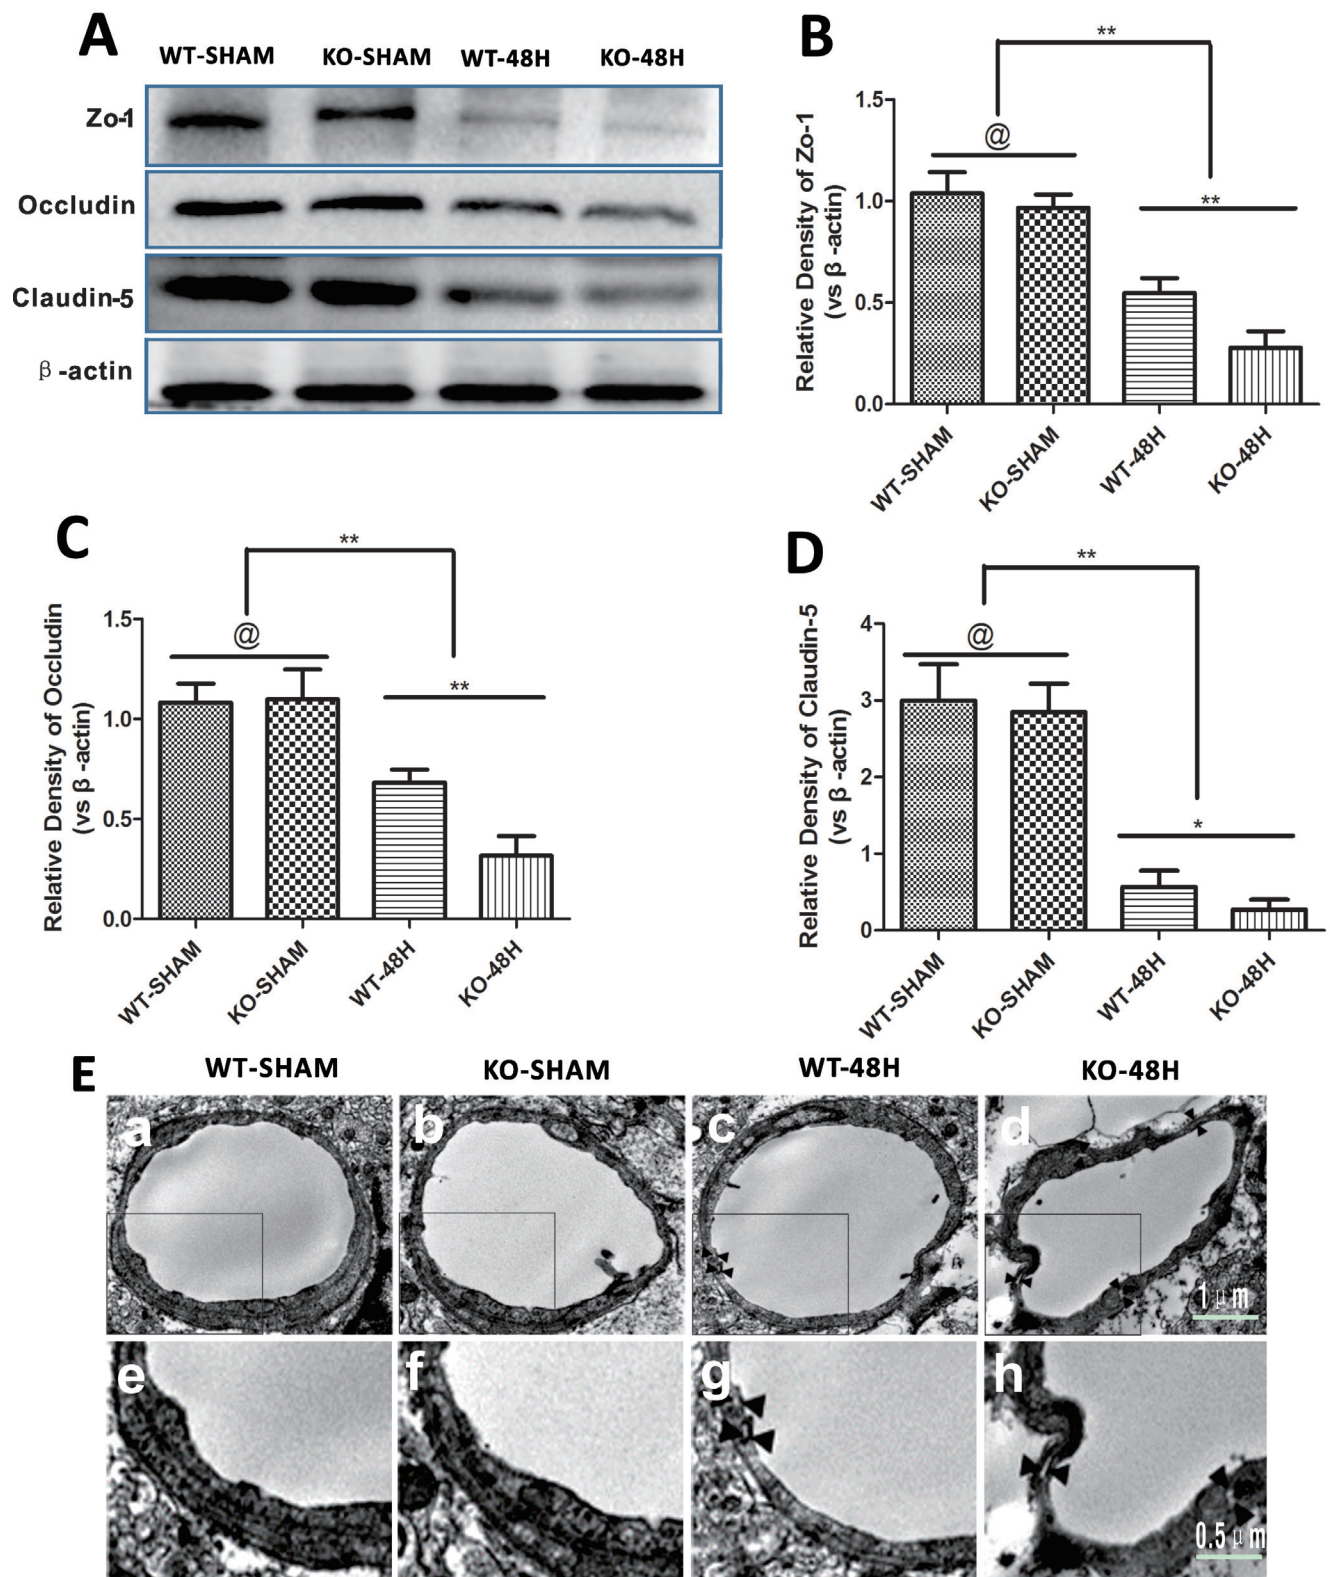

**Figure 6: *Apoe* deficiency aggravates BBB structure damage.** Data are expressed as mean  $\pm$  SEM. A.-D. The three major TJs were simultaneously decreased at 48h post-SAH. Furthermore, the decrease of TJs was more obvious in the KO-48H group (@ represents that  $p > 0.05$ , \* $P < 0.05$ , \*\* $P < 0.01$  respectively,  $n = 5$ ). E. TEM scanning showed TJs disruption and vacuolations between endothelial cells as pointed by the black arrows. In the *Apoe*-deficient mice group, more TJs disruption and bigger vacuolations between endothelial cells could be observed accompanied with microvessels lumen deformation (subjacent figures represent the dotted area in the corresponding ones above).

in magnetic resonance imaging before the peak of endogenous APOE expression at 48h after SAH in the WT mice. *ApoE*<sup>-/-</sup> mice exhibited more severe degrees of these functional BBB disruption characteristics. In addition, the protein levels the major tight junction proteins (TJs) were dramatically reduced 48h after SAH and further affected by *ApoE* deficiency. Similarly, TEM observation showed more disruptions in TJs and vacuolations between endothelial cells. Simultaneously, Apoptosis-related proteins including BAX and Cleaved Caspase-3 were significantly upregulated, while the anti-apoptotic protein BCL2 was decreased after SAH. This phenomenon was more pronounced in *ApoE*-deficient mice, which resulted in increased apoptosis of endothelial cell. Taken together, these data demonstrated a significant crucial role for APOE in BBB stabilization post-SAH.

Although we found that APOE plays an important role in EBI post-SAH through the modulation of BBB integrity, the mechanism by which APOE could influence the response to BBB disruption after SAH have not being directly explored before. There are several possible interpretations of these results. Firstly, inflammation is one of the main mechanisms associated with BBB damage [17]. Bell et al. [9] demonstrated that APOE controls BBB integrity *via* suppressing the inflammatory CypA-NF-κB-MMP-9 pathway in the physiological aging brain. However, there is also support for increased expression of CypA that may play a protective role against

BBB disruption after traumatic brain injury (TBI) [27]. Whether APOE related CypA inhibition is beneficial for the early BBB stabilization after SAH remains unclear. Thus, in search of the molecules that contribute to APOE-mediated BBB integrity in EBI post-SAH, we focused on the proinflammatory cytokine CypA.

Specifically, protein levels of CypA, its downstream target phosphorylated NF-κB subunit P65 (p-P65) and MMP-9 are very low in the sham-operated groups, whereas significant increases were observed after SAH. The activation of CypA was followed by the NF-κB increase and release of abundant proinflammatory cytokines (including IL-6, TNF-α and IL-1β) and MMP-9 upregulation. *ApoE*-deficient mice exhibited more exaggerated levels of CypA, p-P65 and MMP-9 after SAH when compared with WT mice. The increase of NF-κB is involved in the transcriptional activation of MMP-9 in cerebral vessels [28]. NF-κB could also transcriptionally trigger the secretion of proinflammatory cytokines like IL-6, TNF-α and IL-1β [29, 30], which have been previously reported to activate MMP-9 [17].

In the current study, the very low levels of CypA was related to a normal BBB integrity due to less p-P65 and proinflammatory cytokines including IL-6, TNF-α and IL-1β, whereas the increased CypA was associated with a significant disruption of BBB integrity due to increased p-P65 and proinflammatory cytokines release in the WT mice. In the sham operated *ApoE*-deficient

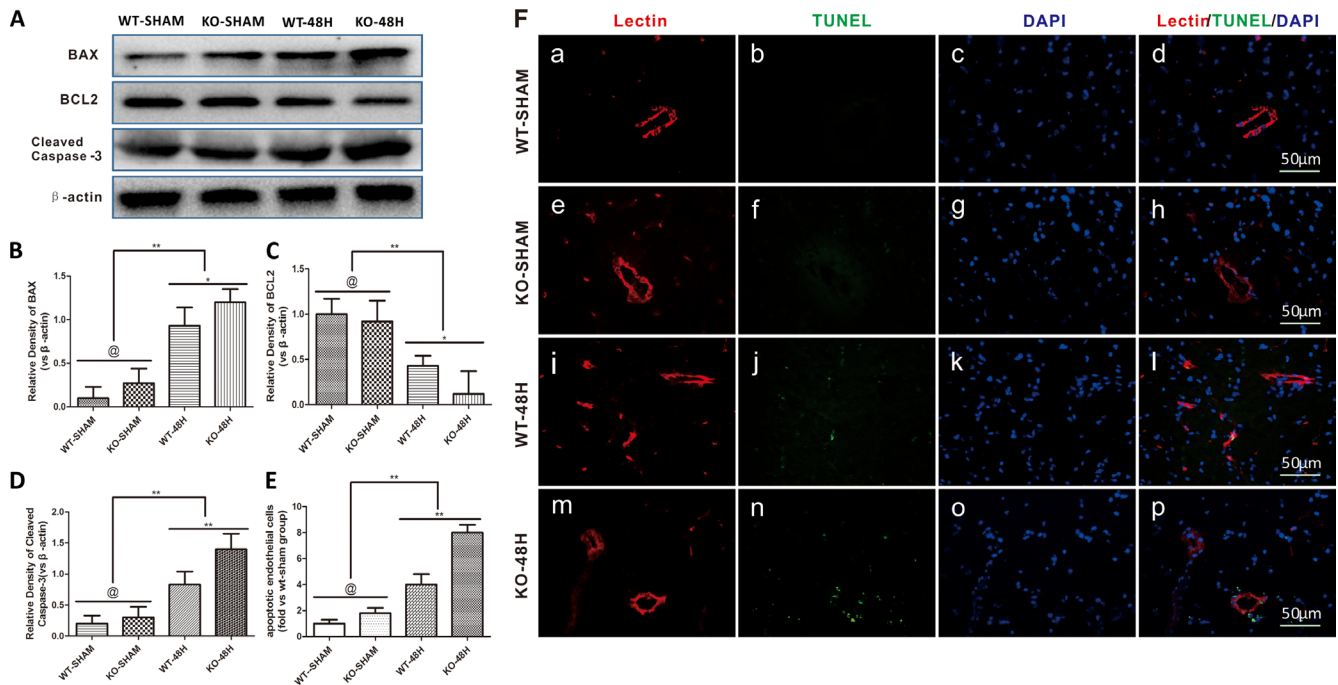

**Figure 7: *ApoE* deficiency aggravates endothelial apoptosis.** Data are expressed as mean ± SEM. **A.-D.** In comparison with wild-type mice, the apoptotic related protein BAX, Cleaved Caspase-3 expressions were higher in the *ApoE*-deficient mice while the antiapoptosis protein BCL2 was significantly lower (@ represents that  $p > 0.05$ ,  $*p < 0.05$ ,  $**p < 0.01$  respectively,  $n = 5$ ). **E.-F.** *ApoE*-deficient mice displayed more endothelial cells death detected by Lectin and TUNEL double staining (Red lectin positive area indicate microvessels; blue area indicate TUNEL and blue DAPI area indicate nucleus; @ represents that  $p > 0.05$ ,  $*p < 0.05$ ,  $**p < 0.01$  respectively,  $n = 5$ ).



mice, CypA was slightly higher than the WT mice and the TJs were slightly fewer than the WT mice. However, the BBB permeability was not significantly different from the WT mice. These non-statistic difference of CypA related BBB integrity may be due to the very young age of mice since previous study reported that Apoe deficiency associated BBB disruption in Alzheimer's disease, without any other acute injury effects, was age-dependent [31]. Therefore, taken these data together, we favor the hypothesis that APOE is indispensable for proper CypA levels in maintaining normal BBB integrity through the direct CypA-NF- $\kappa$ B-MMP-9 pathway under physiological conditions. However, aberrant upregulation of CypA impairs BBB integrity after SAH due to the significant increase of proinflammatory cytokine release while APOE could suppress this detrimental effect through the indirect CypA-NF- $\kappa$ B-proinflammatory cytokines-MMP-9 pathway.

In addition, the direct transcriptional modulation of APOE on inflammatory cytokines maybe also an explanation. Study revealed that APOE could enter into the nuclear and exist a direct transcriptional effect [32]. In this paper, Theendakara V et al. declared that the transcriptional manner of APOE was tightly associated with the expression levels of inflammatory cytokines including NF- $\kappa$ B and IL-6. We also observed a continuous increase of nucleus APOE protein level after SAH (data not shown). However, whether the presently reported inflammatory suppression properties of APOE were simply through the above mentioned mechanisms or combined with transcriptional effect are not tested this time. Later studies should take in technics that analysis the transcriptional effect of APOE on EBI post-SAH.

Another possible mechanism involves endothelial cell apoptosis. Inflammation often results in endothelial cell apoptosis [33]. Previously, CypA was demonstrated

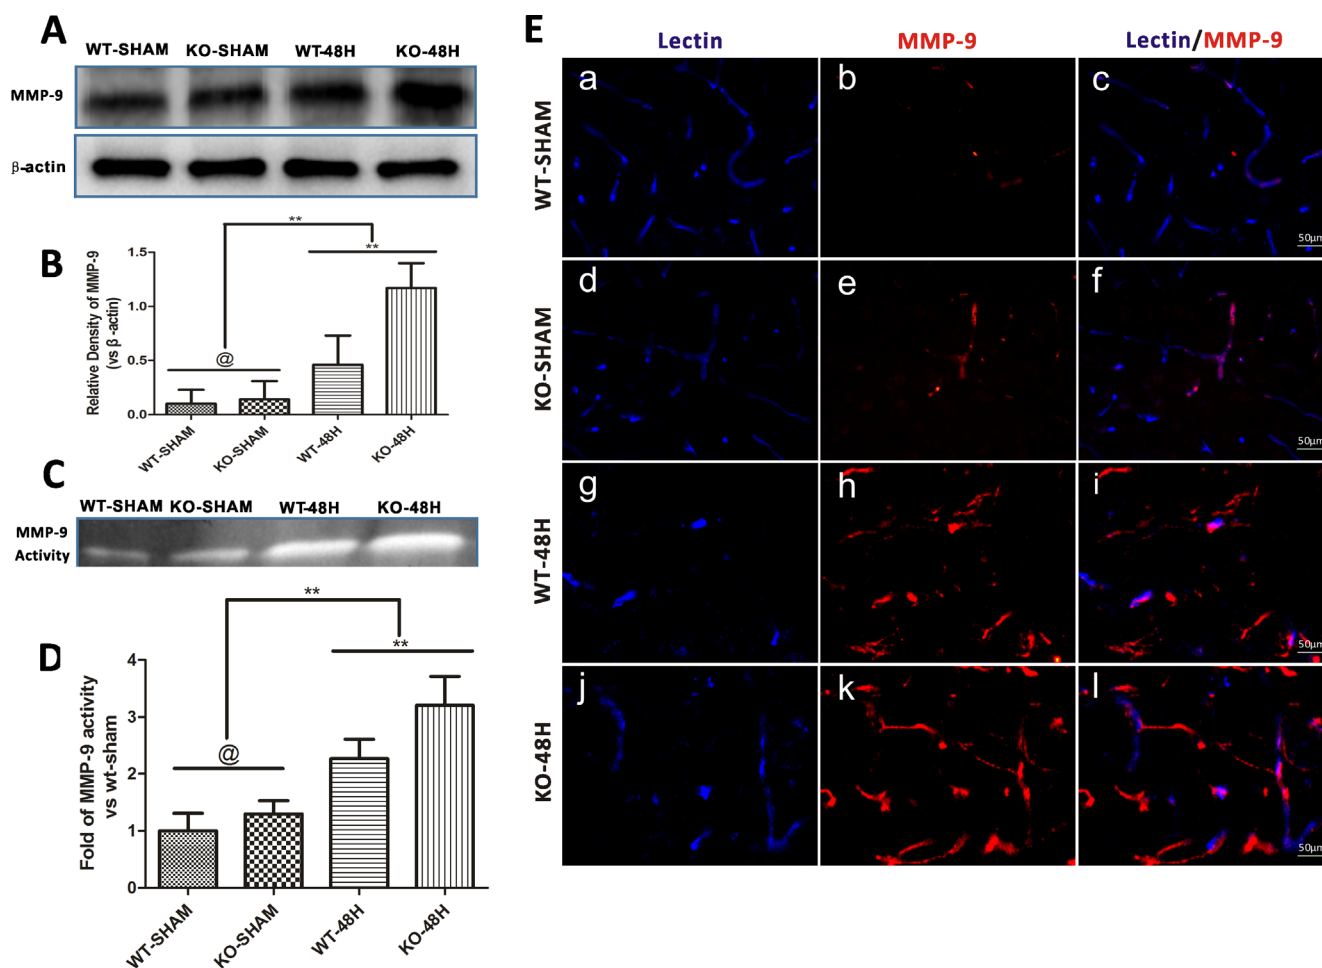

**Figure 8: *Apoe* deficiency aggravates MMP-9 upregulation after SAH.** Data are expressed as mean  $\pm$  SEM. **A.-B.** The protein expression analysed using western blotting demonstrated a greater levels of MMP-9 after SAH in *Apoe*-deficient mice when compared with WT ones. **C.-D.** The MMP-9 enzymatic activity was also higher in *Apoe*-deficient mice at 48h after SAH. **E.** The immunofluorescence stain showed that the perivascular MMP-9 location was abundantly increased after SAH, perivascular MMP-9 positive area was more obvious in the *Apoe*-deficient mice. (Blue lectin positive area indicate microvessels; red area indicate perivascular location of MMP-9; @ represents that  $p > 0.05$ , \*\* $p < 0.01$  respectively,  $n = 5$ ).

to be involved in endothelial cell dysfunctions [34]. In the current study, endothelial cell apoptosis was significantly increased after SAH. Paralleled with the increase of CypA, apoptosis-associated proteins like BAX and Cleaved Caspase-3 were also significantly upregulated, while the anti-apoptotic protein BCL2 was significantly decreased. These changes were more serious in the absence of APOE, which indicated that the reduction of CypA by APOE was also involved in endothelial cell apoptosis after SAH.

It should be noted that endothelial cell apoptosis is not always induced by inflammation. There are two independent apoptosis pathways including a mitochondrial-dependent and a non-mitochondrial-dependent pathways [35, 36]. Whether the suppression of apoptosis by APOE is the effect of inhibiting inflammation through a CypA-related pathway or through the direct suppression of apoptotic pathways is not fully understood this time. The detailed mechanisms remain to be further investigated.

Taken together, the present study investigated the neuroprotective effects of APOE in EBI following SAH and provided potential explanations for these observations. The next station is to investigate whether the APOE-based

therapies, like APOE-peptide mimetics, have therapeutic values in attenuating EBI after SAH. However, there are still several limitations need to be mentioned.

Firstly, mice underwent the endovascular perforation model under anesthesia and experienced bleeding unconsciously, painlessly, and without fear. This situation is significantly different from that of clinical patients who experience bleeding while awake. To study the brain injuries after SAH further, SAH models in which animals are conscious are needed. Secondly, although the statement is still controversial, it was reported that *ApoE* polymorphisms were associated with the outcome of SAH patients, different alleles had different functions [37, 38]. However, the effects of APOE on EBI post-SAH were tested only in WT and *ApoE*<sup>-/-</sup> mice. Transgenic mouse models in which the human APOE alleles have been “knocked in” should be used in future studies. Thirdly, in order to reduce the individual difference factors, all mice used were 8-10 weeks-old young adult male C57BL/6J mice and condition matched *ApoE*<sup>-/-</sup> mice. The neurological functions and BBB integrity were not significantly different before the SAH, whereas the differences were significant after SAH injury. Whether there remain some

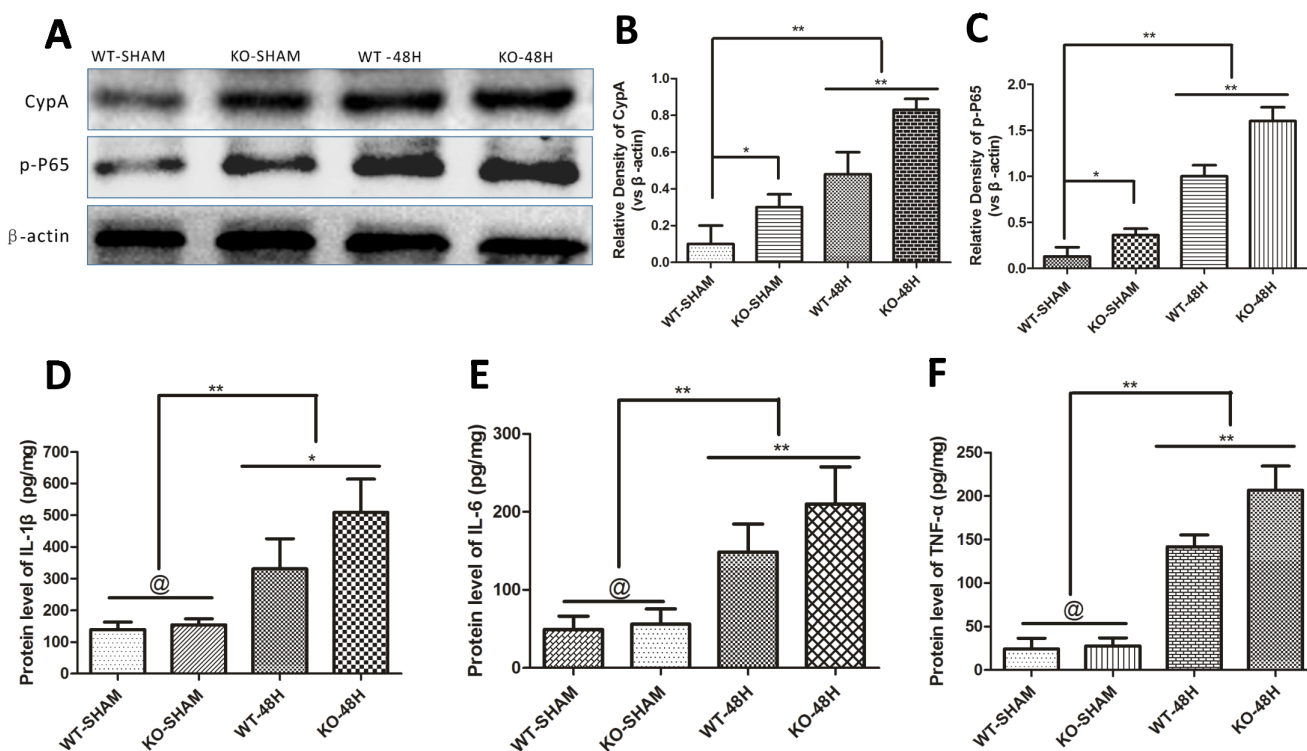

**Figure 9: *ApoE* deficiency aggravates the inflammatory response.** Data are expressed as mean ± SEM. Although the main mediators of MMP-9 like CypA and phosphorylated nuclear factor kappa B subunit p65 (p-P65) were slightly different in the sham group, the discrepancy has greater statistical significance at 48h after SAH (\* $P < 0.05$ , \*\* $P < 0.01$  respectively,  $n = 5$ ) A.-C.. The enzyme-linked immuno sorbent assay (ELISA) measurement of TNF- $\alpha$ , IL-6 and IL-1 $\beta$ , another three inflammatory mediators of MMP-9 downstream the CypA- NF- $\kappa$ B related pathway, showed no significant difference of these inflammatory cytokines. Nevertheless, the discrepancies of these cytokines have greater levels at 48h after SAH in *ApoE*-deficient mice compared with WT mice (@ represents that  $p > 0.05$ , \*\* $P < 0.01$  respectively,  $n = 5$ ) D.-F.

other mechanisms involved in this process, or subject gender and age have effects on the protection of APOE in SAH was unclear.

In summary, this study is the first to our knowledge showing the significance of APOE in attenuating EBI after SAH through a BBB modulation-dependent manner that previous studies had overlooked and open up the idea of BBB disruption as a target of APOE-based therapy for EBI amelioration research. However, as this is an experiment using animal models, more preclinical studies are needed for a variety of variables that have yet to be investigated before our results can be extrapolated to a clinical trial in humans.

## MATERIALS AND METHODS

### Animals

Experimental animals were housed and cared for in the Laboratory Animal Resource Center (LARC) at Chongqing Medical University. All procedures were approved by the Institutional Animal Care and Use Committee (IACUC) at the Chongqing Medical University. Adult male wild-type C57BL/6J mice (WT; 9.1±0.6 weeks; 18.2±0.4g) or condition matched adult male *ApoE*<sup>-/-</sup> on a C57BL/6 background (KO; 8.9±0.2 weeks; 18.1±0.6g) were used.

### Experimental groups

This study included the following 2 parts:

#### Part1

wild-type (WT) mice were randomly assigned to each of the experimental groups to determine the impact of endogenous APOE expression on BBB disruption and outcomes at 6h, 24h, 48h and 72h after SAH (*n* = 15).

#### Part2

After demonstration of the peak of APOE expression 48 h post-SAH, we investigated the role of APOE in BBB restoration by comparing BBB disruption between WT and *ApoE*<sup>-/-</sup> mice 48 h after SAH using the following 4 groups: WT-SHAM, KO-SHAM, WT-48H and KO-48H (*n* = 25).

### Induction of SAH

To induce SAH in mice, endovascular perforation was employed to puncture the bifurcation of the right middle cerebral artery and anterior artery as previously reported [39]. Briefly, mice were anesthetized with 2% pentobarbital (50mg/kg) intraperitoneal injection. A 5-0 monofilament nylon suture (Ethicon, Somerville, NJ,

USA) at the length of 10mm was pushed from the right External Carotid Artery (ECA) into right internal carotid artery (ICA) to perforate the bifurcation of the middle and anterior cerebral artery. In the sham group, all operational procedures were repeated except that the filament did not puncture the microvessel so that vessel rupture was avoided. Dead mice were replaced with condition matched littermates immediately. The body temperature was maintained at 37.5±0.5 during the operation.

### SAH severity and mortality analysis

All surviving mice after the surgery received a dissection and SAH grade analysis. The SAH grade was determined by scoring as previously described [12]. Briefly, High-resolution pictures of the base of the circle of Willis and basilar arteries were taken. The basal cistern was divided into six segments and each segment was allotted a grade from 0 to 3 depending on the amount of blood clot. The total score of the six segment was defined as the severity of mice SAH grade.

Mortality was calculated as the dead mice percentage in the total number of mice after SAH in each group. Only the mice that score higher than 8 and the dead ones due to server bleeding were analyzed.

### Neurobehavioral dysfunction measurements

To investigate the influence of *ApoE* deficiency on neurobehavioral outcomes after SAH, scoring using a modified Garcia Scale (MGS) [40], body weight loss (BWL) [41] and Rota-Rod Latency (RR) [42] were carried out as previously reported. Briefly, for MGS analysis, six tests including spontaneous activity, spontaneous movement of four limbs, forepaw outstretching, climbing, body proprioception and response to whisker stimulation (318 points). The mean of neurologic score for grading was evaluated by two blinded observers. For RR Latency measurement, an automated rota-rod (ZB-200 Rota-Rod Treadmill; Taimeng Software Co. LTD, Chengdu, China) was used. The baseline of Rota-Rod Latency of each mouse was examined immediately before SAH induction with an accelerating speed (started from 0 rpm, accelerated by 3rpm every 10 seconds until the rotating speed reached 30 rpm) for three times and repeated after SAH induction. The Rota-Rod Latency is defined as the average time length of all three trials.

### Magnetic resonance imaging (MRI)

MRI with T<sub>2</sub>-weighted image analysis (T2WI) is a sensitive and reliable detection of vasogenic cerebral edema. Moreover, the main advantage of T2WI over histological methods is the noninvasive nature of the

scanning permits the longitudinal monitoring of the evolution of BBB breakdown and the development of vasogenic edema over time in the same experimental subjects. For the continuous monitoring of BBB disruption and subsequent vasogenic cerebral edema, T<sub>2</sub>-weighted image (T2WI) MRI was performed after neurological evaluation as previously reported [10]. Briefly, MRI scans were performed using a Bruker 7.0T system (BrukerBiospin, Billerica, MA). Pre- and post-SAH mice were anesthetized with isoflurane. T2WI were acquired using RARE (repetition time = 4000, echo time = 45, RARE factor 8, 0.5mm, field of view 2.5 cm, 256×256). A region of interest (ROI) was defined to contain the bilateral parietal lobe sensorimotor cortex and the hippocampus, which are both sensitive to damage.

### Brain water content (BWC) calculations

After neurological evaluation and MRI scanning, BWC was measured as previously reported [43]. Briefly, after the animals were sacrificed with over dose of pentobarbital sodium, the brain samples were harvested and quickly separated into the left and right hemispheres. The brain specimens were immediately weighed to obtain the wet weight and then dried at 100°C for 72h before determining the dry weight. BWC was calculated according to the wet/dry method where  $BWC = (\text{wet weight} - \text{dry weight})/\text{wet weight} \times 100 \%$ .

### Evaluation of BBB permeability

After neurological evaluation, the BBB permeability was evaluated by extravasation of Evans blue dye (EB) following intravenous injection and plasma-derived IgG immunohistochemistry staining as previously reported and individually modified [28, 44]. Briefly, for EB extravasation analysis, 2% EB (4ml/kg, Sigma) was injected intravenously and kept the EB circulated for 3 hours. The animals were intracardially perfused with heparinised 0.9% saline. The brains were harvested and quickly separated into left and right hemispheres and weighted. EB dye was extracted from brain tissues using 50 % trichloroacetic acid and the optical density of supernatants was measured at 620 nm using a multi-mode microplate reader (Molecular Devices, USA). The brain content of EB was expressed as the content of EB dye quantity in the brain quantity (ug/g).

### Transmission electron microscopy (TEM)

Transmission electron microscopy (TEM) was carried out to visualize the BBB structural integrity as previously described [45]. Briefly, mice brain samples contain the bilateral parietal lobe sensorimotor cortex and

the hippocampus were harvested under deep anesthesia and immediately sliced into 1mm<sup>3</sup> slabs, post-fixed in glutaraldehyde overnight at 4°C. Subsequently, the tissues were fixed in 2% osmium, dehydrated in graded ethanol and flat-embedded in epon 812 (EMS Co., Ltd., Washington, USA). Thereafter, ultra-thin sections (50 nm) were made and double stained with uranyl acetate and lead citrate. Sections were then visualized under a Hitachi 7100 transmission electron microscope (Olympus, Tokyo, Japan).

### Western blotting analyses

Brain cortex from the right hemisphere of mice was extracted and Western blotted as previously described [10]. Primary antibodies included mouse monoclonal antibody against APOE (ab1907, Abcam), rabbit polyclonal antibody against MMP-9 (ab38898, Abcam), rabbit polyclonal anti-Zo-1 (ab59720, Abcam), rabbit polyclonal anti-claudin-5 (ab15106, Abcam), rabbit polyclonal anti-occludin (ab31721, Abcam), rabbit monoclonal anti-phospho-NF-kappaB-p65 (p-p65) (3033S, Cell Signaling Technology), rabbit polyclonal anti-BAX (50599-2-Ig, Proteintech), rabbit polyclonal anti-BCL2 (12789-1-AP, Proteintech), rabbit polyclonal anti-Cleaved Caspase-3 (#9664, Cell Signaling Technology) and mouse monoclonal anti-beta-actin (#SC-47778, Santa Cruz) were used on immunoblots.

### Gelatin zymography of MMP-9

The enzymic activity of MMP-9 was detected using a gelatin zymography Kit according to the manufacturer's protocol (GMS30071.1, Genmed Scientifics Inc. U.S.A.).

### Enzyme-linked immunosorbent assay (ELISA)

Quantification of the protein levels of TNF- $\alpha$ , IL-1 $\beta$  and IL-6 were performed by ELISA measurement according to the manufacturer instructions of the ELISA kits (Boster, Wuhan, China). Briefly, homogenates of the right hemisphere of mice were prepared for detection according to the manufacturer's instructions of the ELISA kits. The protein content of each homogenate sample was detected by a BCA kit (Beyotime, Shanghai, China) and the content of each inflammatory cytokine was detected by the ELISA kits and normalized to protein levels.

### Immunofluorescence staining

APOE, MMP-9 and mouse IgG immunofluorescence staining were carried as previously described [46]. Briefly, mice were perfused with ice-cold phosphate buffered saline (PBS, pH = 7.4) followed by 4% paraformaldehyde

(PFA) under deep anesthesia. The whole brains were harvested and coronary frozen sections (10 $\mu$ m) were made. Primary antibodies used included biotinylated lycopersicon esculentum (Tomato) Lectin (B-1175, Vector Laboratories;), mouse monoclonal antibody against APOE (ab1907, Abcam), rabbit polyclonal antibody against GFAP (16825-1-AP, Proteintech), mouse monoclonal antibody against MMP-9 (sc-13520, Santa Cruz) and goat polyclonal antibody against mouse IgG (115-005-003, Jackson). Second antibody used including AMCA Streptavidin (SA-5008, Vector Laboratories), DyLight 488 AffiniPure Goat Anti-Rabbit IgG (A23220, Abbkine), DyLight 594 AffiniPure Goat Anti-Mouse IgG (A23410, Abbkine) and DyLight 488 AffiniPure Rabbit Anti-Goat IgG (A23230, Abbkine).

### Immunofluorescence staining results analysis

Image-pro plus (IPP) 6.0 software was used for immunofluorescence staining results analysis. Three nonadjacent coronary sections in each brain sample with a minimum of 100  $\mu$ m from each other were used and five randomly selected visual fields per section were analyzed. The Lectin-positive and APOE-positive area means the area of Lectin and APOE totally measured using IPP. APOE-positive Lectin area was defined while the area represents the expression of perimicrovascular APOE, it was also measured by area. Meanwhile, the extravasation of plasma IgG was measured by average accumulative fluorescence intensity calculation.

### Statistical analysis

Quantitative data was expressed as mean  $\pm$  SEM and compared with repeated measures of one-way analysis of variance (one-way ANOVA). Bonferroni's post-hoc method was applied for comparison among groups. The mortality analysis was measured by Pearson Chi-Squared test. All statistical values were calculated using SPSS 19.0 software. (SPSS, Inc. Chicago, USA). A value of  $p < 0.05$  was considered to be statistically significant.

### ACKNOWLEDGMENTS

The authors thank radiologist Yu Guo and his team for the help of MRI scanning and data analysis.

### CONFLICTS OF INTEREST

The authors declare no conflicts of interest.

### GRANT FUNDING

This work was supported by grants from the

National Natural Science Foundation of China (No. 81371319; No. 81571159), the Program for New Century Excellent Talents in University (NCET-12-1057), the Foundation for outstanding youth academic technology leaders of Sichuan province (2014JQ0022).

### Authorship contributions

Jinwei Pang and Yue Wu designed research; Jinwei Pang, Yue Wu and Jianhua Peng performed research; Ping Yang, Li Kuai, Xinghu Qin and Fang Cao contributed to data analysis; Xiaochuan, Sun, Ligang, Chen and Michael P. Vitek contributed to paper proofreading; Jinwei Pang, Yue Wu and Yong Jiang wrote the manuscript.

### REFERENCES

1. Grunwald IQ, Kuhn AL, Schmitt AJ and Balami JS. Aneurysmal SAH: current management and complications associated with treatment and disease. *The Journal of invasive cardiology*. 2014; 26:30-37.
2. Hop JW, Rinkel GJ, Algra A and van Gijn J. Case-fatality rates and functional outcome after subarachnoid hemorrhage: a systematic review. *Stroke*. 1997; 28:660-664.
3. Johnston SC, Selvin S and Gress DR. The burden, trends, and demographics of mortality from subarachnoid hemorrhage. *Neurology*. 1998; 50:1413-1418.
4. Huang J and van Gelder JM. The probability of sudden death from rupture of intracranial aneurysms: a meta-analysis. *Neurosurgery*. 2002; 51:1101-1105; discussion 1105-1107.
5. Young AM, Karri SK, Helmy A, Budohoski KP, Kirollos RW, Bulters DO, Kirkpatrick PJ, Ogilvy CS and Trivedi RA. Pharmacologic Management of Subarachnoid Hemorrhage. *World neurosurgery*. 2015; 84:28-35.
6. Fathi AR, Marbacher S, Graupner T, Wehrli F, Jakob SM, Schroth G and Fandino J. Continuous intrathecal glyceryl trinitrate prevents delayed cerebral vasospasm in the single-SAH rabbit model in vivo. *Acta neurochirurgica*. 2011; 153:1669-1675; discussion 1675.
7. Sehba FA, Hou J, Pluta RM and Zhang JH. The importance of early brain injury after subarachnoid hemorrhage. *Progress in neurobiology*. 2012; 97:14-37.
8. Helbok R, Schiefecker AJ, Beer R, Dietmann A, Antunes AP, Sohm F, Fischer M, Hackl WO, Rhomberg P, Lackner P, Pfausler B, Thome C, Humpel C and Schmutzhard E. Early brain injury after aneurysmal subarachnoid hemorrhage: a multimodal neuromonitoring study. *Critical care*. 2015; 19:75.
9. Bell RD, Winkler EA, Singh I, Sagare AP, Deane R, Wu Z, Holtzman DM, Betsholtz C, Armulik A, Sallstrom J, Berk BC and Zlokovic BV. Apolipoprotein E controls cerebrovascular integrity via cyclophilin A. *Nature*. 2012;

485:512-516.

10. Cao F, Jiang Y, Wu Y, Zhong J, Liu J, Qin X, Chen L, Vitek MP, Li F, Xu L and Sun X. Apolipoprotein E-Mimetic COG1410 Reduces Acute Vasogenic Edema following Traumatic Brain Injury. *Journal of neurotrauma*. 2015.
11. Singh K, Chaturvedi R, Barry DP, Coburn LA, Asim M, Lewis ND, Piazuolo MB, Washington MK, Vitek MP and Wilson KT. The apolipoprotein E-mimetic peptide COG112 inhibits NF-kappaB signaling, proinflammatory cytokine expression, and disease activity in murine models of colitis. *The Journal of biological chemistry*. 2011; 286:3839-3850.
12. Sugawara T, Ayer R, Jadhav V and Zhang JH. A new grading system evaluating bleeding scale in filament perforation subarachnoid hemorrhage rat model. *Journal of neuroscience methods*. 2008; 167:327-334.
13. Yen LF, Wei VC, Kuo EY and Lai TW. Distinct patterns of cerebral extravasation by Evans blue and sodium fluorescein in rats. *PloS one*. 2013; 8:e68595.
14. Hue CD, Cho FS, Cao S, Nicholls RE, Vogel Iii EW, Sibindi C, Arancio O, Dale Bass CR, Meaney DF and Morrison Iii B. Time Course and Size of Blood-Brain Barrier Opening in a Mouse Model of Blast-Induced Traumatic Brain Injury. *Journal of neurotrauma*. 2015.
15. Lin XM, Chen LP and Yao X. The impact of different duration of EA-pretreatment on expression of MMP-9 and VEGF in blood-brain barrier in rats with cerebral ischemia-reperfusion injury [Article in Chinese]. *Zhen ci yan jiu*. 2015; 40:40-44.
16. Chaturvedi M and Kaczmarek L. Mmp-9 inhibition: a therapeutic strategy in ischemic stroke. *Molecular neurobiology*. 2014; 49:563-573.
17. Ravindran J, Agrawal M, Gupta N and Rao PV. Alteration of blood brain barrier permeability by T-2 toxin: Role of MMP-9 and inflammatory cytokines. *Toxicology*. 2011; 280:44-52.
18. Annabi B, Lord-Dufour S, Vezina A and Beliveau R. Resveratrol Targeting of Carcinogen-Induced Brain Endothelial Cell Inflammation Biomarkers MMP-9 and COX-2 is Sirt1-Independent. *Drug target insights*. 2012; 6:1-11.
19. Lynch JR, Morgan D, Mance J, Matthew WD and Laskowitz DT. Apolipoprotein E modulates glial activation and the endogenous central nervous system inflammatory response. *Journal of neuroimmunology*. 2001; 114:107-113.
20. Zhou S, Wu H, Zeng C, Xiong X, Tang S, Tang Z and Sun X. Apolipoprotein E protects astrocytes from hypoxia and glutamate-induced apoptosis. *FEBS letters*. 2013; 587:254-258.
21. Rosenblat M, Volkova N, Coleman R and Aviram M. Anti-oxidant and anti-atherogenic properties of liposomal glutathione: studies in vitro, and in the atherosclerotic apolipoprotein E-deficient mice. *Atherosclerosis*. 2007; 195:e61-68.
22. Lendon CL, Han BH, Salimi K, Fagan AM, Behrens MI, Muller MC and Holtzman DM. No effect of apolipoprotein E on neuronal cell death due to excitotoxic and apoptotic agents in vitro and neonatal hypoxic ischaemia in vivo. *The European journal of neuroscience*. 2000; 12:2235-2242.
23. Aoki K, Uchihara T, Sanjo N, Nakamura A, Ikeda K, Tsuchiya K and Wakayama Y. Increased expression of neuronal apolipoprotein E in human brain with cerebral infarction. *Stroke*. 2003; 34:875-880.
24. Kay AD, Day SP, Kerr M, Nicoll JA, Packard CJ and Caslake MJ. Remodeling of cerebrospinal fluid lipoprotein particles after human traumatic brain injury. *Journal of neurotrauma*. 2003; 20:717-723.
25. Germano A, d'Avella D, Imperatore C, Caruso G and Tomasello F. Time-course of blood-brain barrier permeability changes after experimental subarachnoid haemorrhage. *Acta neurochirurgica*. 2000; 142:575-580; discussion 580-571.
26. GaudreaultZheng M, Wei J, Tang Y, Yang C, Wei Y, Yin X and Liu Q. APOE-deficient promotes blood-brain barrier disruption in experimental autoimmune encephalomyelitis via alteration of MMP-9. *Journal of molecular neuroscience*. 2014; 54:282-290.
27. Redell JB, Zhao J and Dash PK. Acutely increased cyclophilin a expression after brain injury: a role in blood-brain barrier function and tissue preservation. *Journal of neuroscience research*. 2007; 85:1980-1988.
28. Li Z, Liang G, Ma T, Li J, Wang P, Liu L, Yu B, Liu Y and Xue Y. Blood-brain barrier permeability change and regulation mechanism after subarachnoid hemorrhage. *Metabolic brain disease*. 2015; 30:597-603.
29. Nigro P, Satoh K, O'Dell MR, Soe NN, Cui Z, Mohan A, Abe J, Alexis JD, Sparks JD and Berk BC. Cyclophilin A is an inflammatory mediator that promotes atherosclerosis in apolipoprotein E-deficient mice. *The Journal of experimental medicine*. 2011; 208:53-66.
30. Wang X, Wang H, Yang H, Li J, Cai Q, Shapiro IM and Risbud MV. Tumor necrosis factor-alpha- and interleukin-1beta-dependent matrix metalloproteinase-3 expression in nucleus pulposus cells requires cooperative signaling via syndecan 4 and mitogen-activated protein kinase-NF-kappaB axis: implications in inflammatory disc disease. *The American journal of pathology*. 2014; 184:2560-2572.
31. Mulder M, Blokland A, van den Berg DJ, Schulten H, Bakker AH, Terwel D, Honig W, de Kloet ER, Havekes LM, Steinbusch HW and de Lange EC. Apolipoprotein E protects against neuropathology induced by a high-fat diet and maintains the integrity of the blood-brain barrier during aging. *Laboratory investigation*. 2001; 81:953-960.
32. Theendakara V, Peters-Libeu CA, Spilman P, Poksay KS, Bredesen DE and Rao RV. Direct Transcriptional Effects of Apolipoprotein E. *The Journal of neuroscience*. 2016; 36:685-700.
33. Dasgupta S, Wang G and Yu RK. Sulfoglucuronosyl paragloboside promotes endothelial cell apoptosis in

- inflammation: elucidation of a novel glycosphingolipid-signaling pathway. *Journal of neurochemistry*. 2011; 119:749-759.
34. Kim SH, Lessner SM, Sakurai Y and Galis ZS. Cyclophilin A as a novel biphasic mediator of endothelial activation and dysfunction. *The American journal of pathology*. 2004; 164:1567-1574.
  35. Tyagi N, Ovechkin AV, Lominadze D, Moshal KS and Tyagi SC. Mitochondrial mechanism of microvascular endothelial cells apoptosis in hyperhomocysteinemia. *Journal of cellular biochemistry*. 2006; 98:1150-1162.
  36. Spyridopoulos I, Wischhusen J, Rabenstein B, Mayer P, Axel DI, Frohlich KU and Karsch KR. Alcohol enhances oxysterol-induced apoptosis in human endothelial cells by a calcium-dependent mechanism. *Arteriosclerosis, thrombosis, and vascular biology*. 2001; 21:439-444.
  37. Wu HT, Zhang XD, Su H, Jiang Y, Zhou S and Sun XC. Association of apolipoprotein E polymorphisms with cerebral vasospasm after spontaneous subarachnoid hemorrhage. *Acta neurochirurgica Supplement*. 2011; 110:141-144.
  38. Csajbok LZ, Nylen K, Ost M, Blennow K, Zetterberg H, Nellgard P and Nellgard B. Apolipoprotein E polymorphism in aneurysmal subarachnoid haemorrhage in West Sweden. *Acta neurologica Scandinavica*. 2016; 133:466-474.
  39. Muroi C, Fujioka M, Okuchi K, Fandino J, Keller E, Sakamoto Y, Mishima K, Iwasaki K and Fujiwara M. Filament perforation model for mouse subarachnoid hemorrhage: surgical-technical considerations. *British journal of neurosurgery*. 2014; 28:722-732.
  40. Zuo S, Li W, Li Q, Zhao H, Tang J, Chen Q, Liu X, Zhang JH, Chen Y and Feng H. Protective effects of Ephedra sinica extract on blood-brain barrier integrity and neurological function correlate with complement C3 reduction after subarachnoid hemorrhage in rats. *Neuroscience letters*. 2015; 609:216-222.
  41. Germano A, Caffo M, Angileri FF, Arcadi F, Newcomb-Fernandez J, Caruso G, Meli F, Pineda JA, Lewis SB, Wang KK, Bramanti P, Costa C and Hayes RL. NMDA receptor antagonist felbamate reduces behavioral deficits and blood-brain barrier permeability changes after experimental subarachnoid hemorrhage in the rat. *Journal of neurotrauma*. 2007; 24:732-744.
  42. Tukhovskaya EA, Yukin AY, Khokhlova ON, Murashev AN and Vitek MP. COG1410, a novel apolipoprotein-E mimetic, improves functional and morphological recovery in a rat model of focal brain ischemia. *Journal of neuroscience research*. 2009; 87:677-682.
  43. Dang B, Li H, Xu X, Shen H, Wang Y, Gao A, He W, Wang Z and Chen G. Cyclophilin A/Cluster of Differentiation 147 Interactions Participate in Early Brain Injury After Subarachnoid Hemorrhage in Rats. *Critical care medicine*. 2015.
  44. Wu J, Zhao D, Wu S and Wang D. Ang-(1-7) exerts protective role in blood-brain barrier damage by the balance of TIMP-1/MMP-9. *European journal of pharmacology*. 2015; 748:30-36.
  45. Zhang R, Tang S, Huang W, Liu X, Li G, Chi H, Zhu M and Tang J. Protection of the brain following cerebral ischemia through the attenuation of PARP-1-induced neurovascular unit damage in rats. *Brain research*. 2015.
  46. Zhang T, Su J, Guo B, Wang K, Li X and Liang G. Apigenin protects blood-brain barrier and ameliorates early brain injury by inhibiting TLR4-mediated inflammatory pathway in subarachnoid hemorrhage rats. *International immunopharmacology*. 2015; 28:79-87.
